# Supplementary material for: Characterization of a Dchs1 mutant mouse reveals requirements for Dchs1-Fat4 signaling during mammalian development
Source: Oxford University Press journal article supplement (doi:10.1242/dev.057166), 2011-02-08
Supplement: dev057166tables1.pdf [file dev057166tables1.pdf]

**Table S1. Mean orientation of stereocilia**

|      | Wild type | <i>Dchs1</i> | <i>Fat4</i> | <i>Dchs1 Fat4</i> |
|------|-----------|--------------|-------------|-------------------|
| IHC  | 5         | 6            | 6           | 5                 |
| OHC1 | 6         | 5            | 8           | 7                 |
| OHC2 | 6         | 8            | 7           | 8                 |
| OHC3 | 9         | 10           | 13          | 14                |

The mean angle, in degrees, by which the orientation of the stereocilia varies from the tangent of rows of hair cells.
